1 **Intravenous colistin use for infections due to multidrug-resistant gram-negative**  
2 **bacilli in critically ill paediatric patients: a systematic review and meta-analysis**

3

4 Spyridon A. Karageorgos, MD,<sup>1,2</sup> Hamid Bassiri, MD, PhD,<sup>2</sup> George Siakallis, MD,  
5 MSc,<sup>1</sup> Michael Miligkos, MD, MSc, PhD,<sup>1,3</sup> Constantinos Tsioutis, MD, PhD<sup>1,4\*</sup>

6

7 <sup>1</sup> Infectious Diseases Working Group, Society of Junior Doctors, Athens, Greece

8 <sup>2</sup> Division of Infectious Diseases and Center for Childhood Cancer Research,  
9 Children's Hospital of Philadelphia, Perelman School of Medicine at the University of  
10 Pennsylvania, USA.

11 <sup>3</sup> Laboratory of Biomathematics, University of Thessaly School of Medicine, Larissa,  
12 Greece

13 <sup>4</sup> School of Medicine, European University Cyprus, Nicosia, Cyprus

14

15 **\*Corresponding author:**

16 Constantinos Tsioutis, MD, PhD, School of Medicine, European University Cyprus, 6  
17 Diogenis Str., Engomi, 1516 Nicosia, Cyprus, Tel: +35722559413, Fax:  
18 +35722559515, Email address: [kostsioutis@gmail.com](mailto:kostsioutis@gmail.com), [k.tsioutis@euc.ac.cy](mailto:k.tsioutis@euc.ac.cy)

19

20 **Abbreviated and Running title:** Colistin in critically ill children

21

22 **Keywords:** colistin; multidrug resistance; paediatric; intensive care unit; systematic  
23 review.

24

25

## 26 **Synopsis**

27 Background: Data are limited regarding the clinical effectiveness and safety of  
28 intravenous colistin for treatment of infections by multidrug-resistant gram-negative  
29 bacilli (MDR-GNB) in the paediatric intensive care unit (PICU).

30 Methods: Systematic review of intravenous colistin use in critically ill paediatric  
31 patients with MDR-GNB infection in PubMed, Scopus and Embase (through January  
32 31<sup>st</sup>, 2018).

33 Results: Out of 1,181 citations, 7 studies were included on the use of intravenous  
34 colistin for 405 patients in PICU. Majority of patients were diagnosed with lower  
35 respiratory tract infections, with *Acinetobacter baumannii* being the predominant  
36 pathogen. Colistin dosages ranged between 2.6-18 mg/kg/day, with none but one case  
37 reporting a loading dose. Emergence of colistin-resistance during treatment was  
38 reported in two cases. Nephrotoxicity and neurotoxicity were reported in 6.1% and  
39 0.5% respectively, but concomitant medications and severe underlying illness limited  
40 our ability to definitively associate use of colistin with nephrotoxicity. Crude  
41 mortality was 29.5% (95%CI 21.7-38.1%), whereas infection-related mortality was  
42 16.6% (95%CI 12.2-21.5%).

43 Conclusions: While the reported incidence of adverse events related to colistin were  
44 low, reported mortality rates for infections by MDR-GNB in PICU were notable. In  
45 addition to severity of disease and comorbidities, inadequate daily dosage and the  
46 absence of a loading dose may have contributed to mortality. As the use of colistin for  
47 treatment of MDR-GNB infections increases, it is imperative to understand whether  
48 optimal dosing of colistin in paediatric patients differs across different age groups. As  
49 such, future studies to establish the pharmacokinetic properties of colistin in different  
50 paediatric settings are warranted.

51

## 52 **Introduction**

53 The increased incidence of infections due to multidrug-resistant (MDR) or  
54 extensively-drug resistant (XDR) gram-negative bacilli (GNB), has a significant  
55 impact on patient safety and public health [1,2]. Given the paucity of effective  
56 antibiotics that are either available or in clinical development, clinicians have resorted  
57 to the use of older agents and combinational therapies for treatment of these infections  
58 [3].

59 Although epidemiological data in paediatric settings are limited, studies  
60 worldwide show that the antibiotic resistances of GNB are increasing at an alarming  
61 rate. For example, a recent report from the Antibiotic Resistance and Prescribing in  
62 European Children (ARPEC) project, demonstrated high rates of resistance to  
63 commonly used antibiotic classes in children, especially for *Escherichia coli*,  
64 *Klebsiella pneumoniae* and *Pseudomonas aeruginosa* [4], while a national  
65 surveillance study among children between 1-17 years of age, revealed a two-fold  
66 increase of carbapenem-resistant *P. aeruginosa* in children in the USA from 1999 to  
67 2012 [5]. In another study in European paediatric and neonatal intensive care units  
68 (ICU), resistance rates among GNB in intra-abdominal infections were higher than  
69 those recorded in non-ICU wards, with MDR rates reaching as high as 13.5% for *P.*  
70 *aeruginosa* and 40.5% for *K. pneumoniae* isolates, whereas the highest MDR rates  
71 were noted in Central (24.5% of isolates) and Southeast (11.5% of isolates) Europe  
72 [6]. Combinations of antibiotics are often necessary to treat these infections, and in  
73 endemic areas these combinations may even be used empirically, prior to  
74 confirmation of antibiotic susceptibilities. The limited clinical experience with the use  
75 of such treatment strategies in children and the lack of clinical trials involving use of  
76 new antibiotics in paediatric populations [7] further aggravate the situation.

77 Colistin, which was discovered in 1949 and used since the 1950s has found a  
78 recent resurgence in use for treatment of infections by MDR- and XDR-GNB [8].  
79 Although the dosing and safety profile of colistin have been extensively studied in  
80 adults, several issues remain unresolved in paediatric patients, particularly the  
81 pharmacokinetics and optimal dosing of children of different ages [8].

82 The aim of this systematic review was to evaluate the available evidence  
83 concerning the clinical effectiveness and safety of colistin in the treatment of  
84 infections due to MDR-GNB in the PICU.

85

## 86 **Material and methods**

### 87 *Data Sources and Search*

88 This review adopted the Preferred Reporting Items for Systematic Reviews and Meta-  
89 Analyses (PRISMA) guidelines [9]. We performed a literature search in PubMed,  
90 Scopus and Embase databases from 2000 through 2018 (last day of search was  
91 January 31<sup>st</sup>, 2018). The search term algorithm applied in PubMed was: (colistin OR  
92 polymyxin E) AND (child\* OR pediatric\* OR paediatric\* OR toddler\* OR  
93 adolescent\*); whereas in Scopus and EMBASE the algorithm was: (colistin OR  
94 polymyxin B) AND (child OR children). The references of articles found in this  
95 manner were subsequently also searched for relevant articles that could meet the  
96 PRISMA criteria.

97

### 98 *Study selection*

99 Articles were eligible for inclusion, provided they fulfilled the following criteria:  
100 inclusion of at least 5 paediatric (defined as  $\geq 1$  month and  $\leq 18$  years of age) patients,  
101 and the use of intravenous colistin for treatment of infections due to MDR, XDR or

102 pandrug-resistant GNB in a PICU setting. According to published definitions, a  
103 multidrug-resistant (MDR) pathogen is one that is resistant to at least 3 antibiotic  
104 classes, an extensively-drug-resistant (XDR) pathogen is resistant to all except one or  
105 two antibiotic classes, and a pandrug-resistant (PDR) pathogen is resistant to all  
106 antibiotic classes [1]. The following studies were excluded from analysis: studies  
107 conducted exclusively in patients with cystic fibrosis; studies that did not include  
108 colistin treatment outcomes; studies that included only neonates or were performed in  
109 a neonatal ICU; studies performed outside of the PICU; studies that used colistin for  
110 treatment of diarrhoea, for decontamination, or for prophylaxis; studies that used  
111 polymyxin B or polymyxin E formulations; studies exclusively concerning topical,  
112 oral, intraventricular, or intrathecal administration of colistin; conference abstracts,  
113 letters to the editor, articles without new data and reviews, and studies published in  
114 languages other than English. Authors of included studies were contacted for further  
115 clarifications when needed.

116

### 117 ***Outcomes and definitions***

118 The primary outcome measure was all-cause mortality in patients who received  
119 intravenous colistin for treatment of the MDR- or XDR- or PDR- GNB infection. If  
120 available, infection-related mortality was also recorded. All reported outcome  
121 measures were classified according to the definitions provided by each study. The  
122 secondary outcomes of interest included the following: clinical cure/improvement;  
123 microbiological eradication of the original pathogen in a subsequent culture; number  
124 and type of adverse events which were either directly related or possibly related to  
125 colistin use, per the determination of the authors; and development of resistance to  
126 colistin during treatment. Nephrotoxicity and neurotoxicity were based on definitions

127 used by each included study. The quality of the evidence regarding outcomes was  
128 assessed using the Grading of Recommendations Assessment, Development and  
129 Evaluation (GRADE) algorithm [10].

130

### 131 *Data extraction*

132 Two investigators (CT and SAK) independently reviewed the titles and abstracts of  
133 the citations for potentially relevant articles using Abstrackr [11]; the full text  
134 publications of potentially relevant articles were retrieved and rescreened by the same  
135 two investigators. Disagreements were resolved by consensus with a third author  
136 (MM). Data were extracted by SAK and GS, using Excel<sup>®</sup> and included author, year,  
137 type of study, geographic region where study was conducted, number and  
138 characteristics of patients, their underlying diseases, severity of disease, type of  
139 infection, causative agents, site of pathogen isolation, colistin dosage, use of other  
140 forms of colistin (intraventricular/intrathecal, inhalation/nebulised, oral, topical),  
141 concomitant antibiotics, and outcomes as defined above.

142

### 143 *Statistical analysis*

144 We calculated the summary mortality rate and corresponding 95% confidence interval  
145 (CI), using the random-effects model with arcsine transformation for proportions [12].  
146 We assessed statistical heterogeneity using the I<sup>2</sup> statistic [13]. Statistical analysis  
147 was performed with OpenMetaAnalyst ([http://www.cebm.brown.edu/open\\_meta/](http://www.cebm.brown.edu/open_meta/)).

148

## 149 **Results**

### 150 *Literature search*

151 For this systematic review (Fig.1), we screened 1,181 non-duplicate citations; we

152 excluded 1,030 as irrelevant and 151 articles were retrieved for full-text review. Study  
153 selection process is presented graphically in Figure 1. Of these, 7 studies met our  
154 inclusion criteria [14–20]. In one study, authors kindly provided clarifications and  
155 additional data [15]. All studies were retrospective and published between 2009 and  
156 2018. Five studies were conducted in Asia [16–20] and two were conducted in Europe  
157 [14,15]. The majority of included studies were single arm retrospective cohorts; as a  
158 result the overall quality of the evidence that contributed to our systematic review was  
159 rated as low to very low [10].

160

### 161 ***Study characteristics***

162 Data were available for 405 patients who received IV colistin for treatment of  
163 infections due to MDR-GNB [14–20]. Sixty one percent (248/405) of patients were  
164 male. The age of patients ranged from 1 month to 18 years. Data on patient  
165 demographics, underlying disorders, type of infections that warranted the initiation of  
166 colistin therapy, isolated microorganisms, site of pathogen isolation, and treatment,  
167 are presented in Table 1.

168

### 169 ***Type of infections and isolated pathogens***

170 The most common infections that warranted use of colistin were lower respiratory  
171 tract infections (primarily ventilator-associated pneumonia), followed by bloodstream  
172 infection, urinary tract infection, central nervous system infection (including external  
173 ventricular drainage-associated ventriculitis or meningitis), and wound infection; sites  
174 from which these GNB were isolated are presented in Table 1. The most commonly  
175 isolated pathogen was *Acinetobacter baumannii*, followed by *P. aeruginosa* and *K.*  
176 *pneumoniae*. Other reported microorganisms were *Enterobacter cloacae*, *E. coli* and

177 *Stenotrophomonas maltophilia*. The exact number of polymicrobial infections could  
178 not be estimated, as this was not clarified in several of the studies.

179

### 180 ***Colistin treatment***

181 Concerning colistin dosage, 4 studies reported colistin dose in milligrams, ranging  
182 from 2.6 to >9 mg/kg/day [14,17–20], two studies [15,16] reported colistin dose in  
183 international units (IU), ranging from 40,000 to 225,000 IU/kg/day (estimated at 3.2-  
184 18 mg/kg/day according to Ortwine et al [21]). Three studies reported that colistin  
185 was administered in 3 divided daily doses [14,16,20]. A loading dose was reported in  
186 one patient [15], consisting of 225,000 IU/kg (estimated at 18 mg/kg [21]). Mean  
187 duration of colistin treatment was 10.8 to 31.6 days (range 2-133 days). In the  
188 majority of included studies, colistin was used in combination therapy, most  
189 commonly with carbapenems, glycopeptides, and aminoglycosides [14–17,19,20].  
190 Three studies reported co-administration of IV colistin with other formulations of  
191 colistin (aerosolised, intraventricular) as presented in Table 1 [15,17,19].

192

### 193 ***Mortality***

194 Mortality was reported in all included studies (405 patients) [14–20]. The summary  
195 all- cause mortality was 29.5% (95% CI 21.7-38.1%,  $I^2=64.7\%$ ; Figure 2). In 6 studies  
196 that reported an association between mortality and infection [14–17,19,20], the  
197 infection-related mortality was 16.6% (95% CI 12.2-21.5%,  $I^2=13.1\%$ ; Figure 3).

198

### 199 ***Clinical outcomes, microbiological eradication, and adverse events***

200 All studies provided information on secondary outcomes (Table 2). The summary  
201 clinical cure/improvement, as defined by the study authors in 6 studies [14–16,18–20]



202 was 73.1% (95% CI 64.4-81.0%,  $I^2=58.2$ ; Figure 4). In one study, clinical  
203 cure/improvement was reported in 70/87 (80.4%) episodes [17].

204 In 5 studies that included data on follow-up cultures, microbiological  
205 eradication was confirmed in 150/206 (72.8%) of patients [14,16,19,20] and in 68/87  
206 (78.2%) of episodes [17]. Development of resistance to colistin during therapy was  
207 reported in 2 patients, after prolonged use of intravenous and intraventricular colistin  
208 in one patient, and intravenous and aerosolised colistin in the other [15].

209 Data regarding adverse events were reported in all seven studies (Table 3)  
210 [14–20]. Nephrotoxicity (defined either as creatinine elevation from baseline or  
211 decrease of creatinine clearance during colistin treatment) was detected in 25/405  
212 (6.1%) of patients. Notably, all patients with renal injury were either receiving  
213 concomitant nephrotoxic agents (such as vancomycin, aminoglycosides, radio  
214 contrast, or amphotericin B), or had pre-renal impairment or multiorgan failure.  
215 Management of renal impairment was reported in 5 patients as follows: colistin dose  
216 was adjusted in three [15,16], colistin was discontinued in one [17], and colistin was  
217 continued with renal replacement therapy in another [17]. In four patients [15,16,19]  
218 renal function returned to normal after colistin was adjusted or stopped, while three  
219 patients died of multiorgan failure [16]; the outcome of renal function was not  
220 reported in the remaining patients. Neurotoxicity was detected in 2/405 (0.5%) of  
221 patients [17]. Neurotoxicity was described as generalised tonic-clonic seizures on the  
222 first day of colistin administration without recurrence thereafter. Finally, in one study  
223 [16], four cases of microscopic haematuria in the context of disseminated  
224 intravascular coagulation were also reported.

225

226 **Discussion**

227 MDR-GNB have emerged as a significant cause of infection in paediatric settings,  
228 resulting in increased morbidity and mortality [2,3]. Colistin, to which many of these  
229 MDR-GNB retain sensitivity, has gained increased use over the last decade [8], a fact  
230 that is supported by the observation that all included studies were published after  
231 2009. In this systematic review, we found that colistin use had a relatively low rate of  
232 adverse events and resulted in favourable clinical outcome in 73.1% of paediatric  
233 patients with MDR-GNB infections hospitalised in a PICU setting, although the  
234 pooled and infection-related mortality rates were 29.5% and 16.6% respectively. It is  
235 also worth noting that the majority of included studies were conducted in countries  
236 that are known to have a high prevalence of MDR-GNB, signifying the importance of  
237 prudent use of colistin, to preserve its efficacy against these pathogens.

238         Our results demonstrate that the majority of MDR-GNB infections in the  
239 PICU treated with colistin were lower respiratory tract infections (and especially  
240 ventilator-associated pneumonia). Furthermore, we show that *A. baumannii* was the  
241 predominant pathogen, and most treated patients possessed significant comorbidities.  
242 Nonetheless, colistin achieved clinical improvement/cure and microbiological  
243 eradication in ~70% of infections. The observed pooled mortality rate in our study  
244 reflects that of critically ill children with severe infections observed in other  
245 multicentre [22,23] and single-centre [24–26] studies. Yet a previous systematic  
246 review of colistin use in children reported a lower crude mortality rate (7.4%) [27].  
247 There are however, critical differences between these two studies: in the other study,  
248 not all patients were critically ill, MDR pathogens were infrequent, a proportion of  
249 patients were receiving systemic colistin for prophylaxis rather than treatment, and the  
250 majority of included studies were case reports. In support of our contention that these  
251 features may dramatically alter the mortality rates, adults treated with colistin for

252 infections by carbapenem-resistant GNB had rates of clinical cure/improvement and  
253 mortality that were more comparable to what we report, with estimated pooled  
254 mortality rates between 33.8% - 35.7% [28,29].

255         As far as adverse events are concerned, colistin demonstrated a relatively good  
256 rate of tolerability. The most frequently reported adverse event was nephrotoxicity,  
257 detected in a small proportion of paediatric patients (6.1%). However, a clear causal  
258 association with colistin could not be ascertained, since most of these patients  
259 received concomitant nephrotoxic agents or had underlying conditions that  
260 compromised renal function. These are factors that have been previously associated  
261 with colistin-related nephrotoxicity in adults [30]. Of note, the reversibility of kidney  
262 injury after cessation or dose adjustment of colistin, supports the necessity for  
263 continuous awareness and frequent monitoring of renal function. Neurotoxicity  
264 complicated only 0.5% of paediatric patients, and other adverse events were reported  
265 in a small proportion. We believe that the lower rates of acute kidney injury and  
266 neurotoxicity [27] reported in the previous systematic review of colistin use in  
267 children are again attributable to the differences in the study characteristics. However,  
268 it is worthy to note that the adverse event profile of colistin use in adults is different;  
269 in a recent meta-analysis regarding the use of colistin in MDR-GNB infections,  
270 colistin-related nephrotoxicity was noted to be much higher (19.2%), while  
271 neurotoxicity was not reported [28].

272         The notable difference in rates of nephrotoxicity highlights the observation  
273 that during childhood, various physiologic alterations affect drug pharmacokinetics  
274 (e.g. volume of distribution, protein binding and renal clearance) and thus,  
275 conclusions derived from adult studies do not readily apply to paediatric populations  
276 [31], thus highlighting the need for future studies regarding the pharmacodynamics of

277 colistin therapy in paediatric patients. Indeed, the need for a loading dose and the  
278 optimal dosing of colistin is likely to vary between different age groups according to  
279 renal function and body weight, or body surface area [31]. In support of this notion,  
280 adult cases of nephrotoxicity have been associated with excessive colistin dosage,  
281 owed to calculation of doses based on ideal body weight rather than actual body  
282 weight [32]. Finally, future paediatric studies should employ strict definitions  
283 regarding colistin-related clinical outcomes and adverse events, in order to better  
284 evaluate the side effect profile of colistin and these studies should report all potential  
285 colistin-related side effects instead of focusing primarily on the historically reported  
286 ones (nephrotoxicity and neurotoxicity).

287         In closing, we would like to acknowledge two limitations of our study. Firstly,  
288 the studies reported herein were all cohort studies; while this diminishes the quality of  
289 evidence, we also cannot exclude an outcome reporting bias favouring the reporting  
290 of successful treatments. Secondly, in one study [17] infection episodes were reported  
291 rather than infected patients, making interpretations from this study difficult to  
292 correlate to the number of affected children. Despite its shortcomings, our study  
293 argues that colistin may be relatively safe to use in children with severe MDR-GNB  
294 infections in which therapeutic options are limited.

295

## 296 **Conclusions**

297 In an era of increasing antimicrobial resistance, the present systematic review  
298 suggests that colistin for infections by MDR-GNB in paediatric patients in the PICU  
299 results in favourable clinical outcomes and has an acceptable safety profile. Until a  
300 more robust understanding of the pharmacokinetics and pharmacodynamics of colistin  
301 in various paediatric populations has been completed, colistin dosing should be

302 carefully estimated in order to achieve maximum efficacy with the lowest possibility  
303 of adverse events, as this drug remains one of the last resorts for treatment of  
304 infections by MDR-GNB.

305

306 **Ethical approval:** Not required.

307 **Funding:** none to declare.

308 **Transparency declarations:** none to declare.

309

### 310 **Author Contributions**

311 Spyridon A. Karageorgos (SAK): conceptualised and designed the study, participated  
312 in data acquisition, extraction and interpretation, prepared tables, wrote and drafted  
313 the initial manuscript and approved the final manuscript as submitted.

314 Hamid Bassiri (HB): participated in data interpretation, reviewed and revised the  
315 manuscript and approved the final manuscript as submitted.

316 George Siakallis (GS): participated in data extraction and interpretation, reviewed and  
317 revised the initial manuscript and approved the final manuscript as submitted.

318 Michael Miligkos (MM): participated in data analysis and interpretation, reviewed  
319 and revised the initial manuscript and approved the final manuscript as submitted.

320 Constantinos Tsioutis (CT): conceptualised and designed the study, interpreted the  
321 data, wrote and drafted the initial manuscript, reviewed and revised the manuscript  
322 and approved the final manuscript as submitted.

323

324 **References**

- 325 [1] Magiorakos A-P, Srinivasan A, Carey RB, Carmeli Y, Falagas ME, Giske CG, et  
326 al. Multidrug-resistant, extensively drug-resistant and pandrug-resistant bacteria:  
327 an international expert proposal for interim standard definitions for acquired  
328 resistance. *Clin Microbiol Infect* 2012;18:268–81. doi:10.1111/j.1469-  
329 0691.2011.03570.x.
- 330 [2] Tacconelli E, Cataldo MA, Dancer SJ, De Angelis G, Falcone M, Frank U, et al.  
331 ESCMID guidelines for the management of the infection control measures to  
332 reduce transmission of multidrug-resistant Gram-negative bacteria in  
333 hospitalized patients. *Clin Microbiol Infect* 2014;20:1–55. doi:10.1111/1469-  
334 0691.12427.
- 335 [3] Lutsar I, Telling K, Metsvaht T. Treatment option for sepsis in children in the  
336 era of antibiotic resistance. *Expert Rev Anti Infect Ther* 2014;12:1237–52.  
337 doi:10.1586/14787210.2014.956093.
- 338 [4] Bielicki JA, Lundin R, Sharland M, others. Antibiotic resistance prevalence in  
339 routine bloodstream isolates from children’s hospitals varies substantially from  
340 adult surveillance data in Europe. *Pediatr Infect Dis J* 2015;34:734–741.
- 341 [5] Logan LK, Gandra S, Mandal S, Klein EY, Levinson J, Weinstein RA, et al.  
342 Multidrug- and Carbapenem-Resistant *Pseudomonas aeruginosa* in Children,  
343 United States, 1999–2012. *J Pediatr Infect Dis Soc* 2016:piw064.  
344 doi:10.1093/jpids/piw064.
- 345 [6] Lob SH, Badal RE, Hackel MA, Sahm DF. Epidemiology and Antimicrobial  
346 Susceptibility of Gram-Negative Pathogens Causing Intra-abdominal Infections  
347 in Pediatric Patients in Europe—SMART 2011–2014. *J Pediatr Infect Dis Soc*  
348 2016:piv109. doi:10.1093/jpids/piv109.
- 349 [7] Garazzino S, Lutsar I, Bertaina C, Tovo P-A, Sharland M. New antibiotics for  
350 paediatric use: A review of a decade of regulatory trials submitted to the  
351 European Medicines Agency from 2000—Why aren’t we doing better? *Int J*  
352 *Antimicrob Agents* 2013;42:99–118. doi:10.1016/j.ijantimicag.2013.05.001.
- 353 [8] Nation RL, Li J, Cars O, Couet W, Dudley MN, Kaye KS, et al. Framework for  
354 optimisation of the clinical use of colistin and polymyxin B: the Prato polymyxin  
355 consensus. *Lancet Infect Dis* 2015;15:225–234.
- 356 [9] Moher D, Liberati A, Tetzlaff J, Altman DG. Preferred reporting items for  
357 systematic reviews and meta-analyses: the PRISMA statement. *Ann Intern Med*  
358 2009;151:264–269.
- 359 [10] Guyatt GH, Oxman AD, Vist GE, Kunz R, Falck-Ytter Y, Alonso-Coello P, et  
360 al. GRADE: an emerging consensus on rating quality of evidence and strength of  
361 recommendations. *BMJ* 2008;336:924–6.
- 362 [11] Wallace BC, Small K, Brodley CE, Lau J, Trikalinos TA. Deploying an  
363 interactive machine learning system in an evidence-based practice center:  
364 abstrackr. *Proc ACM Int Health Inform Symp IHI* 2012:819–824.  
365 doi:10.1145/2110363.2110464.
- 366 [12] Trikalinos TA, Trow P, Schmid CH. Simulation-Based Comparison of Methods  
367 for Meta-Analysis of Proportions and Rates. Rockville (MD): Agency for  
368 Healthcare Research and Quality (US); 2013.
- 369 [13] Higgins JPT, Thompson SG, Deeks JJ, Altman DG. Measuring inconsistency in  
370 meta-analyses. *BMJ* 2003;327:557–60. doi:10.1136/bmj.327.7414.557.
- 371 [14] Falagas ME, Sideri G, Vouloumanou EK, Papadatos JH, Kafetzis DA.  
372 Intravenous Colistimethate (Colistin) Use in Critically Ill Children Without

- 373 Cystic Fibrosis: *Pediatr Infect Dis J* 2009;28:123–7.  
374 doi:10.1097/INF.0b013e31818a5dbd.
- 375 [15] Iosifidis E, Antachopoulos C, Ioannidou M, Mitroudi M, Sdougka M, Drossou-  
376 Agakidou V, et al. Colistin administration to pediatric and neonatal patients. *Eur*  
377 *J Pediatr* 2010;169:867–74. doi:10.1007/s00431-009-1137-3.
- 378 [16] Kapoor K, Jajoo M, Dublsh S, Dabas V, Gupta S, Manchanda V. Intravenous  
379 Colistin for Multidrug-Resistant Gram-Negative Infections in Critically Ill  
380 Pediatric Patients: *Pediatr Crit Care Med* 2013;14:e268–72.  
381 doi:10.1097/PCC.0b013e31828a740f.
- 382 [17] Paksu MS, Paksu S, Karadag A, Sensoy G, Asilioglu N, Yildizdas D, et al. Old  
383 agent, new experience: colistin use in the paediatric Intensive Care Unit—a  
384 multicentre study. *Int J Antimicrob Agents* 2012;40:140–4.  
385 doi:10.1016/j.ijantimicag.2012.04.010.
- 386 [18] Phan PH, Nguyen TV. Colistin therapy for severe hospital-acquired infections  
387 caused by multidrug-resistant gramnegative bacteria in pediatric patients. *Pediatr*  
388 *Crit Care Med* 2014;15:156.
- 389 [19] Polat M, Kara SS, Tapisız A, Tezer H, Kalkan G, Dolgun A. Treatment of  
390 Ventilator-Associated Pneumonia Using Intravenous Colistin Alone or in  
391 Combination with Inhaled Colistin in Critically Ill Children. *Pediatr Drugs*  
392 2015;17:323–30. doi:10.1007/s40272-015-0133-5.
- 393 [20] Sahbudak Bal Z, Kamit Can F, Yazici P, Berna Anil A, Duyu M, Yilmaz  
394 Ciftdogan D, et al. The evaluation of safety and efficacy of colistin use in  
395 pediatric intensive care unit: Results from two reference hospitals and review of  
396 literature. *J Infect Chemother* 2018. doi:10.1016/j.jiac.2017.12.017.
- 397 [21] Ortwine JK, Kaye KS, Li J, Pogue JM. Colistin: Understanding and Applying  
398 Recent Pharmacokinetic Advances. *Pharmacother J Hum Pharmacol Drug Ther*  
399 2015;35:11–6. doi:10.1002/phar.1484.
- 400 [22] Shime N, Kawasaki T, Saito O, Akamine Y, Toda Y, Takeuchi M, et al.  
401 Incidence and risk factors for mortality in paediatric severe sepsis: results from  
402 the national paediatric intensive care registry in Japan. *Intensive Care Med*  
403 2012;38:1191–7. doi:10.1007/s00134-012-2550-z.
- 404 [23] Rosenthal VD, Maki DG, Jamulitrat S, Medeiros EA, Todi SK, Gomez DY, et  
405 al. International Nosocomial Infection Control Consortium (INICC) report, data  
406 summary for 2003-2008, issued June 2009. *Am J Infect Control* 2010;38:95–  
407 104.e2. doi:10.1016/j.ajic.2009.12.004.
- 408 [24] Karbuz A, Özdemir H, Yaman A, Kocabaş BA, Ödek Ç, Güriz H, et al. The Use  
409 of Colistin in Critically Ill Children in a Pediatric Intensive Care Unit: *Pediatr*  
410 *Infect Dis J* 2014;33:e19–24. doi:10.1097/INF.000000000000117.
- 411 [25] Gupta A, Kapil A, Lodha R, Kabra SK, Sood S, Dhawan B, et al. Burden of  
412 healthcare-associated infections in a paediatric intensive care unit of a  
413 developing country: a single centre experience using active surveillance. *J Hosp*  
414 *Infect* 2011;78:323–6. doi:10.1016/j.jhin.2011.04.015.
- 415 [26] El-Nawawy A, Ashraf GA, Antonios MAM, Meheissen MA, El-Alfy MMR.  
416 Incidence of Multidrug-Resistant Organism Among Children Admitted to  
417 Pediatric Intensive Care Unit in a Developing Country. *Microb Drug Resist*  
418 2018. doi:10.1089/mdr.2017.0414.
- 419 [27] Falagas ME, Vouloumanou EK, Rafailidis PI. Systemic colistin use in children  
420 without cystic fibrosis: a systematic review of the literature. *Int J Antimicrob*  
421 *Agents* 2009;33:503.e1-503.e13. doi:10.1016/j.ijantimicag.2008.10.021.

- 422 [28] Ni W, Cai X, Wei C, Di X, Cui J, Wang R, et al. Efficacy of polymyxins in the  
423 treatment of carbapenem-resistant Enterobacteriaceae infections: a systematic  
424 review and meta-analysis. *Braz J Infect Dis* 2015;19:170–80.  
425 doi:10.1016/j.bjid.2014.12.004.
- 426 [29] Tsioutis C, Kritsotakis EI, Karageorgos SA, Stratakou S, Psarologakis C,  
427 Kokkini S, et al. Clinical epidemiology, treatment and prognostic factors of  
428 extensively drug-resistant *Acinetobacter baumannii* ventilator-associated  
429 pneumonia in critically ill patients. *Int J Antimicrob Agents* 2016;48:492–7.  
430 doi:10.1016/j.ijantimicag.2016.07.007.
- 431 [30] Pogue JM, Lee J, Marchaim D, Yee V, Zhao JJ, Chopra T, et al. Incidence of  
432 and Risk Factors for Colistin-Associated Nephrotoxicity in a Large Academic  
433 Health System. *Clin Infect Dis* 2011;53:879–84. doi:10.1093/cid/cir611.
- 434 [31] Kearns GL, Abdel-Rahman SM, Alander SW, Blowey DL, Leeder JS, Kauffman  
435 RE. Developmental pharmacology—drug disposition, action, and therapy in  
436 infants and children. *N Engl J Med* 2003;349:1157–1167.
- 437 [32] DeRyke CA, Crawford AJ, Uddin N, Wallace MR. Colistin Dosing and  
438 Nephrotoxicity in a Large Community Teaching Hospital. *Antimicrob Agents*  
439 *Chemother* 2010;54:4503–5. doi:10.1128/AAC.01707-09.
- 440



**Figure 1.** Study selection

**Figure 2.** All-cause mortality

**Figure 3.** Infection-related mortality

**Figure 4.** Clinical cure/improvement

**Table 1.** Study Characteristics

| <b>Study, Country, Year [Ref]</b> | <b>No. patients (pts), or courses (crs) [male]</b> | <b>Mean age<sup>a</sup> (range)</b> | <b>Underlying disorders (no. patients)</b>                                                                                                 | <b>Type of infection as reported by authors (no. patients)</b>                         | <b>Causative organism (no. patients)<sup>b,c</sup></b>                | <b>Site of pathogen isolation</b>                                                  | <b>Type of colistin formulation (add'l mode of delivery)</b> | <b>Dose of colistin and duration of treatment<sup>a</sup></b>  | <b>Concomitant therapeutic regimens (n patients)</b>                                                                                                                                         |
|-----------------------------------|----------------------------------------------------|-------------------------------------|--------------------------------------------------------------------------------------------------------------------------------------------|----------------------------------------------------------------------------------------|-----------------------------------------------------------------------|------------------------------------------------------------------------------------|--------------------------------------------------------------|----------------------------------------------------------------|----------------------------------------------------------------------------------------------------------------------------------------------------------------------------------------------|
| Falagas et al Greece 2009         | 6 pts [5]                                          | 11y (14m-13y)                       | GM1 gangliosidosis (1)<br>Cerebral palsy (1)<br>None (4)                                                                                   | LRTI (4)<br>BSI (1)<br>LRTI+BSI (1)                                                    | PA (3)<br>AB (2)<br>KP+AB (1)                                         | Bronchial secretions (4)<br>Blood (1)<br>Blood & bronchial secretions (1)          | Colistimethate sodium (ND)                                   | 5mg/kg/d ÷3 doses<br><br>Mean 10.7d                            | Piperacillin/tazobactam (1)<br>Gentamicin (1)<br>Imipenem/silastatin (1)<br>Liposomal amphotericin B (1)<br>Metronidazole (1)<br>Vancomycin (1)                                              |
| Iosifidis et al Greece 2010       | 12 pts 18 crs [5]                                  | 5y (1.5m-14y)                       | RDS, psychomotor retardation (2)<br>Trauma (2)<br>Hydrocephalus, EVD (1)<br>TB meningitis, EVD (1)<br>Meningomyelocele, hydrocephalus, EVD | RTI(4)<br>CNS infection (2)<br>BSI+RTI (2)<br>BSI (1)<br>Trauma (1)<br>Trauma+ RTI (1) | AB (6)<br>PA (1)<br>EC1 (1)<br>AB+SM (1)<br>AB+KP (1)<br>KP+PA+SM (1) | Bronchial secretions (4)<br>Blood & bronchial secretions (2)<br>CSF (2)<br>CSF and | Colistimethate sodium (3 IVT; 2 inhaled)                     | Range 40,000-225,000 IU/Kg/d<br><br>Range 7-133d (3/12 rec'd < | Aminoglycosides (16/18 crs)<br>Carbapenems (12/18 crs)<br>Teicoplanin (5/18 crs)<br>Vancomycin (4/18 crs)<br>Metronidazole (4/18 crs)<br>Fluconazole (4/18 crs)<br>Amphotericin B (4/18 crs) |

|                               |                          |                     |                                                                                                                                                                     |                                                                                             |                                                                          |                                                                                                                                                         |                            |                                                                                    |                                                                                                                                                                                                                            |
|-------------------------------|--------------------------|---------------------|---------------------------------------------------------------------------------------------------------------------------------------------------------------------|---------------------------------------------------------------------------------------------|--------------------------------------------------------------------------|---------------------------------------------------------------------------------------------------------------------------------------------------------|----------------------------|------------------------------------------------------------------------------------|----------------------------------------------------------------------------------------------------------------------------------------------------------------------------------------------------------------------------|
|                               |                          |                     | (1)<br>Spinal tumor (1)<br>Brain tumor+<br>leukemia (1)<br>RDS+ seizures (1)<br>Wilson disease+ liver<br>transplantation (1)<br>Respiratory failure+<br>obesity (1) | CNS<br>infection+<br>RTI (1)                                                                | AB+KP+<br>PA<br>+ECI(1)                                                  | bronchial<br>secretions<br>(2)<br>Trauma and<br>bronchial<br>secretions<br>(1)<br>Trauma (1)                                                            |                            | 21d)                                                                               | TMP/SMX (3/18 crs)<br>Piperacillin/tazobactam<br>(2/18 crs)<br>Voriconazole (1/18 crs)<br>Tigecycline (1/18 crs)<br>Cloxacillin (1/18 crs)<br>Clarithromycin (1/18<br>crs)<br>Gancyclovir (1/18 crs)<br>Anti-TB (1/18 crs) |
| Kapoor et al<br>India<br>2013 | 50 pts<br>[30]           | 36m<br>(1m-<br>12y) | Septic shock (29)<br>Ileal perforation (3)<br>Esophageal stricture<br>(1)                                                                                           | CAP (18)<br>VAP (12)                                                                        | AB (35)<br>PA (9)<br>KP (7)<br>ECo (3)<br>ECI (1)                        | Endotrachea<br>l lavage (25)<br>Blood (22)<br>Urine (3)<br>Pleural fluid<br>(1)<br>5 pts with<br>pos. cultures<br>from >1 site<br>with same<br>organism | Colistin<br>NOS            | 50,000-<br>75,000<br>IU/Kg/d÷<br>3 doses<br><br>Mean<br>14.3d<br>(range 7-<br>21). | Meropenem (35)<br>Piperacillin/sulbactam<br>(10)<br>Vancomycin (6)<br>Fluconazole (4)<br>Amphotericin B (2)                                                                                                                |
| Paksu et al<br>Turkey<br>2012 | 79 pts<br>87 crs<br>[43] | 30m                 | Chronic<br>neurological/neuromu<br>scular disease (26)<br>Congenital heart<br>disease (10)<br>Primary<br>immunodeficiency (8)<br>Metabolic disorders                | VAP (49)<br>VAP+BSI<br>(18)<br>BSI (9)<br>Sepsis (8)<br>CNS<br>infection (1)<br>Soft tissue | AB<br>(52/87)<br>PA<br>(16/87)<br>KP (1/87)<br>AB+PA+<br>KP (7/87)<br>NR | Tracheal<br>aspirate<br>fluid (63/87)<br>Blood<br>(28/87)<br>Skin swabs,<br>conjunctival<br>swabs (5/87)                                                | Colistin<br>NOS (1<br>IVT) | Mean±SD<br>5.4±0.6<br>mg/Kg/d<br><br>Mean<br>17.2±8.4d<br>(2-62)                   | Glycopeptides (36)<br>Antifungal agents (32)<br>Carbapenems (28)<br>Aminoglycosides (27)<br>Fluoroquinolones (12)<br>Linezolid (12)<br>Cefoperazone/sulbactam<br>(8)                                                       |

|                                            |                             |                  |                                                                                                                                                                                                                 |                                                     |                                       |                                                         |                                                                         |                                                                                               |                                                                                                                                                                       |
|--------------------------------------------|-----------------------------|------------------|-----------------------------------------------------------------------------------------------------------------------------------------------------------------------------------------------------------------|-----------------------------------------------------|---------------------------------------|---------------------------------------------------------|-------------------------------------------------------------------------|-----------------------------------------------------------------------------------------------|-----------------------------------------------------------------------------------------------------------------------------------------------------------------------|
|                                            |                             |                  | (7)<br>Malignancy (2)<br>Others (9)                                                                                                                                                                             | infection (1)<br>Peritonitis (1)                    | (11/87)                               | Others (peritoneal, CSF) (2/87)                         |                                                                         |                                                                                               | Piperacillin/tazobactam (6)<br>Antiviral agents (5)<br>Others (8)                                                                                                     |
| Phan et al<br>Vietnam<br>2014              | 104<br>[73]                 | 4m               | NR                                                                                                                                                                                                              | VAP (45)                                            | AB, KP, PA consisted 92% of organisms | NR                                                      | Colistimethate sodium (NR)                                              | Mean 6.2±1.2 mg/Kg/d<br><br>Median 17d (IQR 11-23)                                            | NR                                                                                                                                                                    |
| Polat et al<br>Turkey<br>2015 <sup>d</sup> | 32<br>[15]<br><br>18<br>[7] | 18m<br><br>13.5m | Metabolic disorders (16)<br>Chronic neurological/neuromuscular diseases (15)<br>Malignancy (9)<br>Chronic liver disease, Congenital heart disease and thromboembolic events (6)<br>Primary immunodeficiency (4) | VAP 50/50                                           | AB (37)<br>PA (13)                    |                                                         | Colistimethate sodium (0)<br><br>Colistimethate sodium (18 aerosolized) | 3.2mg/kg/d (2.6-5 mg/kg/d). 16 days (10-22)<br><br>3.4mg/kg/d (2.8-5 mg/kg/d). 14 days (5-21) | Glycopeptides (33/50)<br>Carbapenems (30/50)<br>Aminoglycosides (21/50)<br>Cefoperazome/sulbactam (9/50)<br>Piperacillin/tazobactam (8/50)<br>Fluoroquinolones (5/50) |
| Sahbudak Bal et al<br>Turkey<br>2017       | 104<br>[70]                 | 55.9m            | Chronic neurological/neuromuscular disorder (27)<br>Congenital heart disease (14)                                                                                                                               | VAP (60)<br>CLABSI+ sepsis (22)<br>CLABSI+ VAP (7/) | AB (57/104)<br>PA (25/104)<br>KP      | Endotracheal lavage 59<br>Blood 26<br>Urine 10<br>CSF 3 | Colistin NOS (13 intrathecal)                                           | 5 mg/kg/day in 3 doses<br>12.5±6.4                                                            | Aminoglycosides 76/104<br>Glycopeptides 33/104<br>Amphotericin B 30/104<br>Meropenem 7/104<br>Antiviral agents                                                        |

|  |  |  |                                                                                                                                                       |                                                                              |                                                                  |                    |  |                            |                                                                    |
|--|--|--|-------------------------------------------------------------------------------------------------------------------------------------------------------|------------------------------------------------------------------------------|------------------------------------------------------------------|--------------------|--|----------------------------|--------------------------------------------------------------------|
|  |  |  | Chronic lung disease (11)<br>Cancer (10)<br>BM/solid transplantation (10)<br>Primary immune deficiency (6)<br>Chronic liver disease (6)<br>Others (3) | CLABSI+ UTI (4)<br>VAP+ UTI (3)<br>UTI (3)<br>Shunt infection (3)<br>SSI (2) | (12/104)<br>AB+KP+ PA (3/104)<br>)<br>ECo (2/104)<br>EC1 (1/104) | Peritoneal fluid 2 |  | (2-30)<br>(mean±SD (range) | (aciclovir, ganciclovir) 6/104<br>Ciprofloxacin 5<br>TMP-SMX 2/104 |
|--|--|--|-------------------------------------------------------------------------------------------------------------------------------------------------------|------------------------------------------------------------------------------|------------------------------------------------------------------|--------------------|--|----------------------------|--------------------------------------------------------------------|

AB=*A. baumannii*; BSI= Blood stream infection; CAP= community acquired pneumonia; CLABSI=Central line-associated bloodstream infection; CNS= Central nervous system; CSF= Cerebrospinal fluid; EC1= *E. coli*; ECo=*E. cloacae*; EVD= External ventricular device; IU= International units; IVT=Intraventricular; KP= *K. pneumoniae*; LRTI=Lower respiratory tract infection; m=months; ND=No data; NOS=not otherwise specified; NR= Not reported; PA=*P. aeruginosa*; PICU=Pediatric Intensive Care Unit; RDS= acute respiratory distress syndrome; RTI= Respiratory tract infection; SD=standard deviation; SM=*S. maltophilia*; SSI= Surgical site infection; TB=tuberculosis; TMP-SMX- trimethoprim-sulfamethoxazole; UTI=Urinary tract infection; VAP=Ventilator-associated pneumonia; y=years.

<sup>a</sup> Data are provided as medians (range) unless otherwise specified.

<sup>b</sup> Some infections were polymicrobial.

<sup>c</sup> All presented data refer to MDR GNB unless otherwise specified.

<sup>d</sup> Two patients were not admitted to the PICU during colistin administration

**Table 2. Outcomes**

| <b>Study, Year [Ref]</b>      | <b>No. patients</b>       | <b>Clinical Cure/improvement</b> | <b>Definition of clinical cure/improvement</b>                                           | <b>Microbiological eradication</b>      | <b>Definition of microbiological eradication</b>                                                                 | <b>Deaths (related to infection that required colistin therapy)</b> |
|-------------------------------|---------------------------|----------------------------------|------------------------------------------------------------------------------------------|-----------------------------------------|------------------------------------------------------------------------------------------------------------------|---------------------------------------------------------------------|
| Falagas et al 2009            | 6                         | 6                                | Improvement of symptoms and signs of the index infection and the laboratory values       | 6                                       | Eradication of the pathogen isolated initially by culture                                                        | 2                                                                   |
| Iosifidis et al 2010          | 12 (18 courses)           | 16/18 courses<br>10/12 patients  | No clinical or laboratory signs of infection                                             | ND                                      | ND                                                                                                               | 2 (2 related to index infection)                                    |
| Kapoor et al 2013             | 50                        | 36                               | Resolving presenting signs and symptoms                                                  | 44/46 with available follow up cultures | Absence of the same organism from the same site on follow up cultures                                            | 14 (all had MODS)                                                   |
| Paksu et al 2012 <sup>a</sup> | 87 episodes (79 patients) | 70 episodes                      | Complete recovery from clinical findings of index infection at end of colistin treatment | 68 episodes                             | Eradication of the causative microorganism in the final culture                                                  | 12 (10 related to index infection)                                  |
| Phan et al 2014               | 104                       | 61                               | ND                                                                                       | ND                                      | ND                                                                                                               | 44 (ND)                                                             |
| Polat et al 2015 <sup>b</sup> | 50                        | 38                               | Clinical cure or improvement                                                             | 38                                      | Bacterial eradication (no growth of the causative organism on follow-up cultures regardless of clinical outcome) | 20 (9 related to index infection)                                   |
| Sahbudak Bal et al 2017       | 104                       | 79                               | Complete recovery from clinical findings of                                              | 62                                      | Culture clearance at the end of therapy                                                                          | 31 (15 related to index infection)                                  |

|  |  |  |                    |  |  |  |
|--|--|--|--------------------|--|--|--|
|  |  |  | index<br>infection |  |  |  |
|--|--|--|--------------------|--|--|--|

<sup>a</sup> Numbers provided in episodes.

MODS= Multiple organ dysfunction syndrome; ND= No data

**Table 3.** Adverse events

| <b>Study, Year [Ref]</b> | <b>No. patients</b> | <b>Patients with nephrotoxicity</b>                                                                                   | <b>Definition of nephrotoxicity</b>                                                                                                          | <b>Patients with neurotoxicity</b> | <b>Definition of neurotoxicity</b>                                           | <b>Patients with other adverse events</b>       |
|--------------------------|---------------------|-----------------------------------------------------------------------------------------------------------------------|----------------------------------------------------------------------------------------------------------------------------------------------|------------------------------------|------------------------------------------------------------------------------|-------------------------------------------------|
| Falagas et al 2009       | 6                   | 0                                                                                                                     | 2-fold increase in creatinine from baseline to >1.3 mg/dL                                                                                    | 0                                  | Level of consciousness, seizures, visual disturbance, neuromuscular blockade | 0                                               |
| Iosifidis et al 2010     | 12 (18 courses)     | 1                                                                                                                     | Elevation of creatinine values beyond the estimated normal range for age                                                                     | 0                                  | Neuromuscular blockade, seizures, disturbance of consciousness               | 0                                               |
| Kapoor et al 2013        | 50                  | 5* (3 with MODS, 2 with concomitant vancomycin) (nephrotoxicity at 3 <sup>rd</sup> -6 <sup>th</sup> day of treatment) | 2-fold increase in creatinine from baseline or a 30% decrease in creatinine clearance                                                        | 0                                  | Level of consciousness, seizures, visual disturbance, neuromuscular blockade | 4 (microscopic hematuria in the context of DIC) |
| Paksu et al 2012         | 79 (87 episodes)    | 2 (both with concomitant gentamicin) (1 developed at day 8)                                                           | Serum creatinine >1.1 mg/dL or a 50% reduction in creatinine clearance or need for renal replacement therapy at any time                     | 2 (tonic-clonic seizures)          | Neuromuscular blockade, seizures, change in level of consciousness           | 0                                               |
| Phan et al 2014          | 104                 | 5 (all with MODS)                                                                                                     | ND                                                                                                                                           | 0                                  | ND                                                                           | 0                                               |
| Polat et al 2015         | 50                  | 1* (concomitant vancomycin & radiocontrast) (day 8)                                                                   | Increase in serum creatinine by $\geq 50\%$ from the baseline and/or elevation of serum creatinine beyond the estimated normal range for age | 0                                  | ND                                                                           | ND                                              |
| Sahbudak Bal et al       | 104                 | 11 (all with concomitant                                                                                              | Blood creatinine level >1.2                                                                                                                  | 0                                  | Paresthesia, neuromuscular                                                   | 0                                               |



|      |  |                                                                        |                                                                                      |  |                                                      |  |
|------|--|------------------------------------------------------------------------|--------------------------------------------------------------------------------------|--|------------------------------------------------------|--|
| 2017 |  | nephrotoxic agents)<br>(4 at day 0-3<br>6 at day 3-7<br>1 at day 7-14) | mg/dL or an increase of 50% above baseline creatinine or a decline in renal function |  | blockade, seizures, change in level of consciousness |  |
|------|--|------------------------------------------------------------------------|--------------------------------------------------------------------------------------|--|------------------------------------------------------|--|

\*: Not clearly related to colistin use.

DIC= Disseminated intravascular coagulation; MODS= Multiple organ dysfunction syndrome;  
ND= No data.

**Figure 1.** Study selection

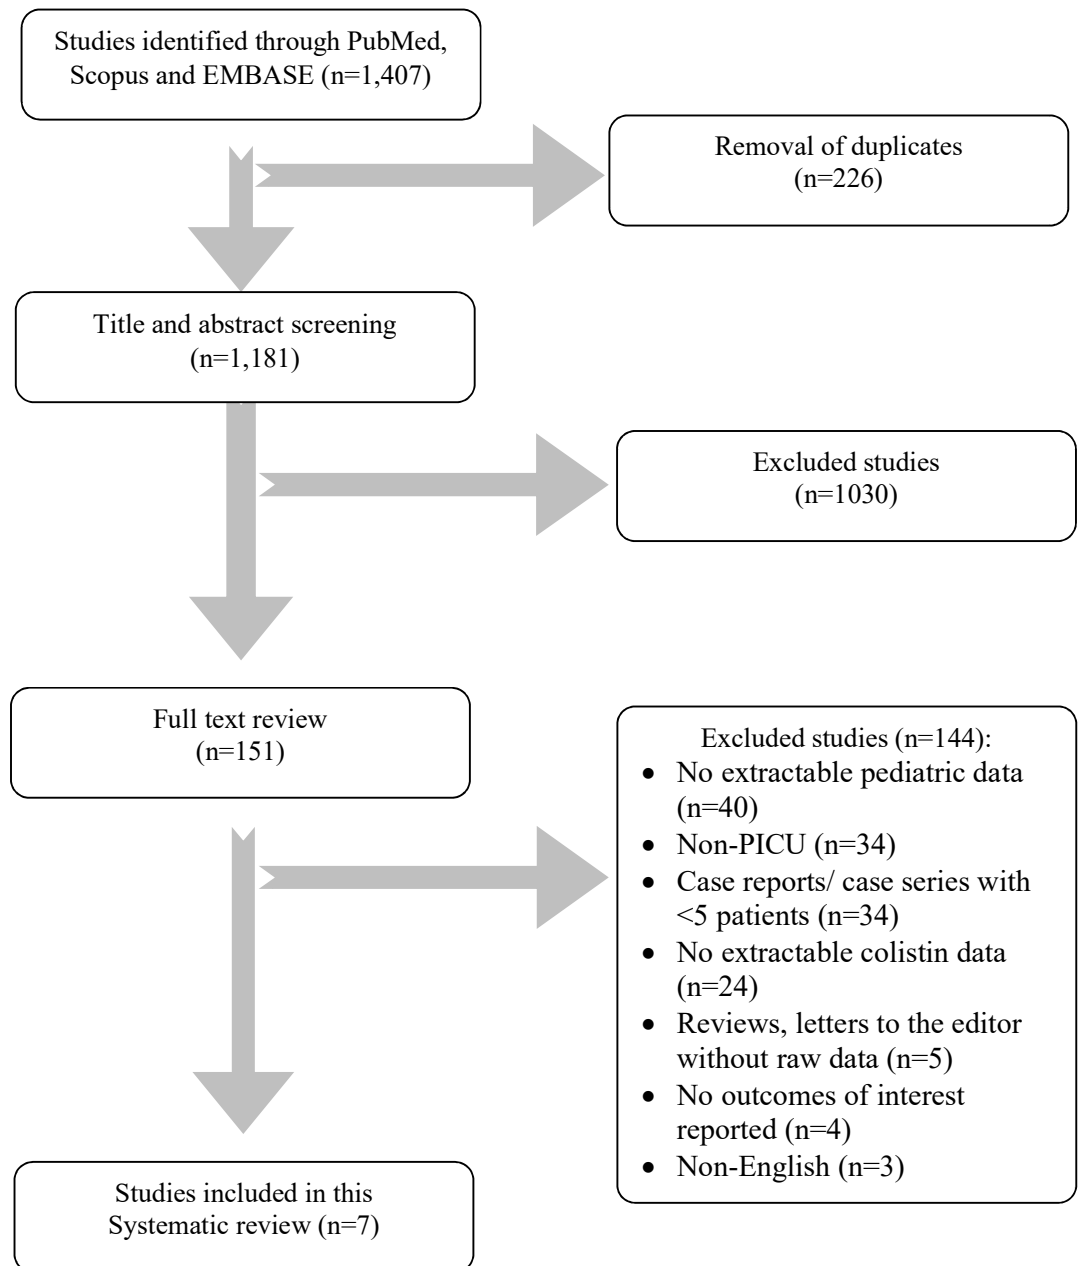

| Studies                                          | Estimate (95% C.I.)         | Events/Total   |
|--------------------------------------------------|-----------------------------|----------------|
| Falagas 2009                                     | 0.333 (0.046, 0.722)        | 2/6            |
| Iosifidis 2010                                   | 0.167 (0.019, 0.418)        | 2/12           |
| Kapoor 2013                                      | 0.280 (0.166, 0.411)        | 14/50          |
| Paksu 2012                                       | 0.152 (0.082, 0.239)        | 12/79          |
| Phan 2014                                        | 0.423 (0.330, 0.519)        | 44/104         |
| Polat 2015                                       | 0.400 (0.270, 0.538)        | 20/50          |
| Sahbudak Bal 2017                                | 0.298 (0.214, 0.389)        | 31/104         |
| <b>Overall (I<sup>2</sup>=64.71 % , P=0.002)</b> | <b>0.295 (0.217, 0.381)</b> | <b>125/405</b> |

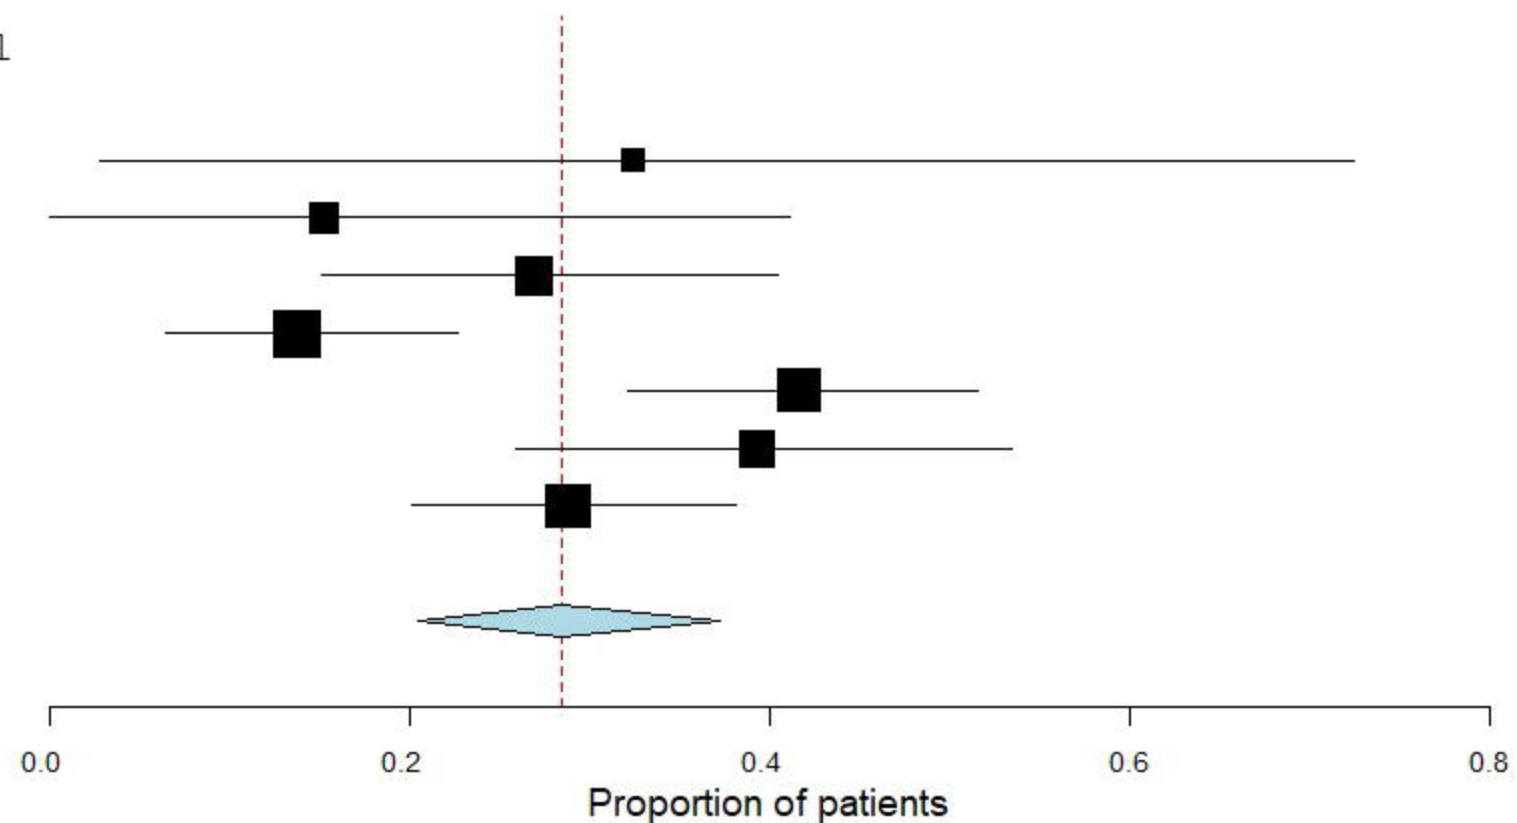

| Studies                                          | Estimate (95% C.I.)         | Events/Total  |
|--------------------------------------------------|-----------------------------|---------------|
| Falagas 2009                                     | 0.071 (0.000, 0.358)        | 0/6           |
| Iosifidis 2010                                   | 0.167 (0.019, 0.418)        | 2/12          |
| Kapoor 2013                                      | 0.280 (0.166, 0.411)        | 14/50         |
| Paksu 2012                                       | 0.127 (0.063, 0.208)        | 10/79         |
| Polat 2015                                       | 0.180 (0.087, 0.297)        | 9/50          |
| Sahbudak Bal 2017                                | 0.144 (0.084, 0.218)        | 15/104        |
| <b>Overall (I<sup>2</sup>=13.06 % , P=0.321)</b> | <b>0.166 (0.122, 0.215)</b> | <b>50/301</b> |

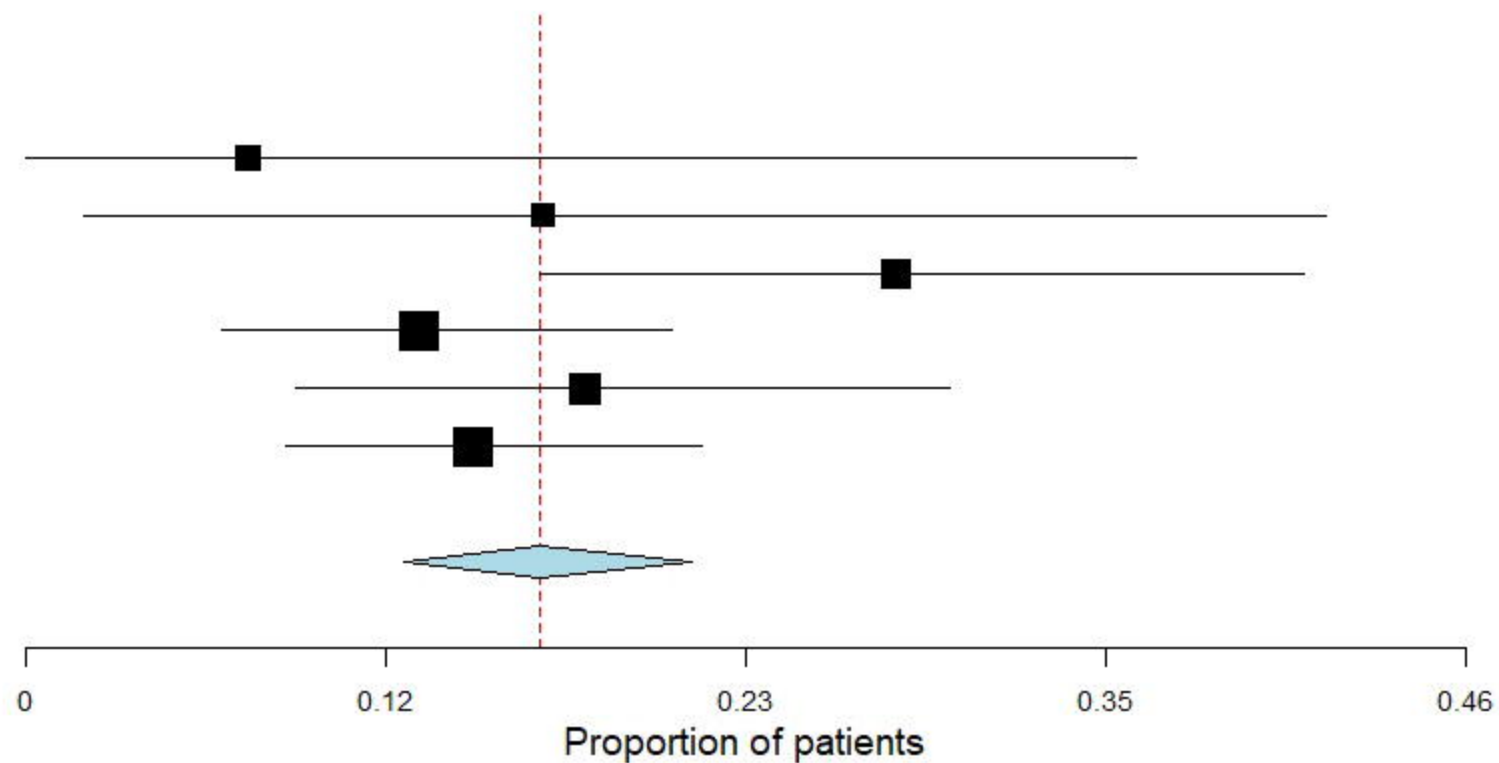

| Studies                                          | Estimate (95% C.I.)         | Events/Total   |
|--------------------------------------------------|-----------------------------|----------------|
| Falagas 2009                                     | 0.929 (0.642, 1.000)        | 6/6            |
| Iosifidis 2010                                   | 0.833 (0.582, 0.981)        | 10/12          |
| Kapoor 2013                                      | 0.720 (0.589, 0.834)        | 36/50          |
| Phan 2014                                        | 0.587 (0.491, 0.679)        | 61/104         |
| Polat 2015                                       | 0.760 (0.633, 0.867)        | 38/50          |
| Sahbudak Bal 2017                                | 0.760 (0.673, 0.836)        | 79/104         |
| <b>Overall (I<sup>2</sup>=58.24 % , P=0.028)</b> | <b>0.731 (0.644, 0.810)</b> | <b>230/326</b> |

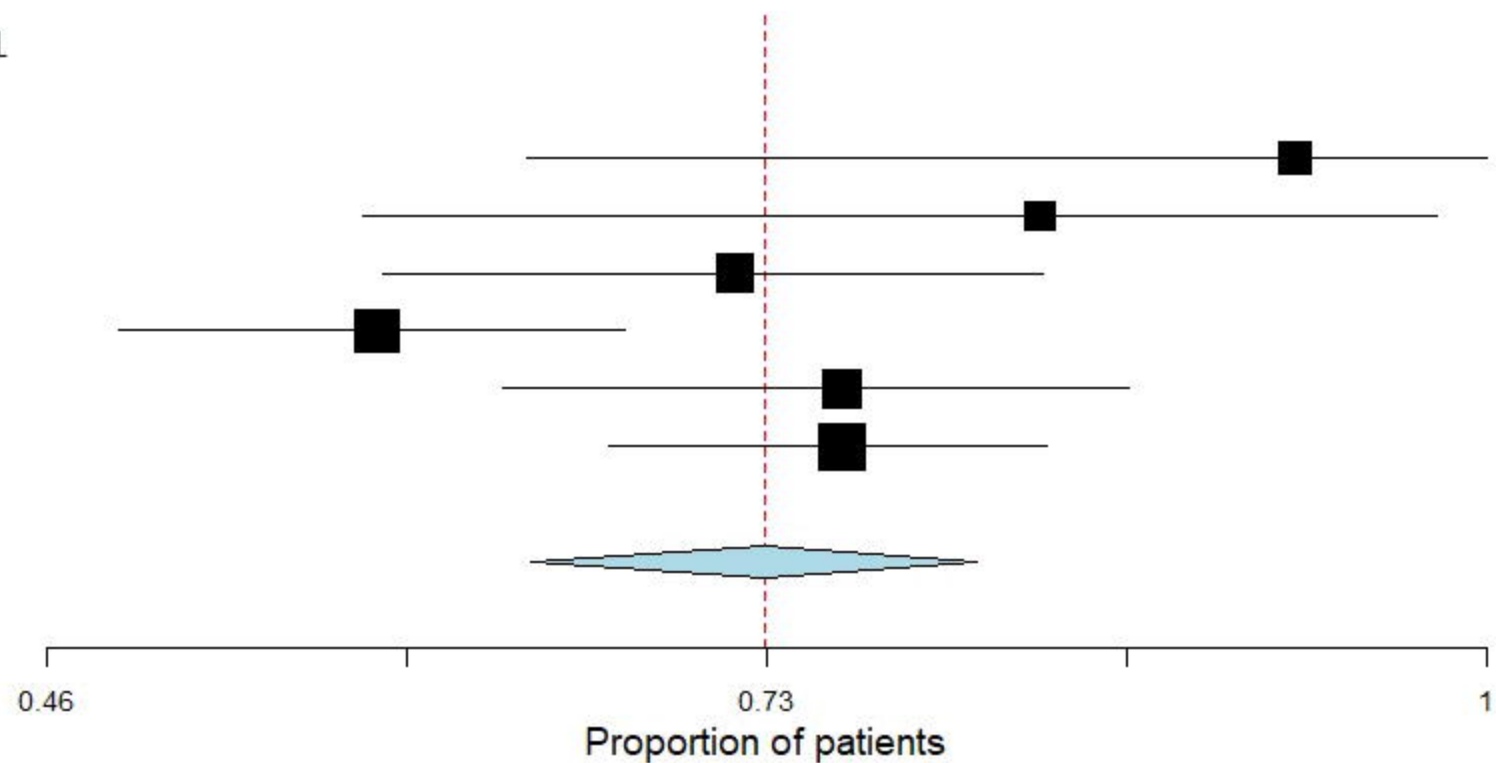

Source: http://biorxiv.org/content/10.1101/465559v1.full.pdf
